# Supplementary material for: Therapeutic strategy for spinal muscular atrophy by combining gene supplementation and genome editing
Source: PubMed Central journal article supplement (PMC11269569; doi:10.1038/s41467-024-50095-5), 2024-07-24
Supplement: 41467_2024_50095_MOESM3_ESM.pdf [file 41467_2024_50095_MOESM3_ESM.pdf]

## **Description of Additional Supplementary Files**

**Supplementary Movie 1.** General behavior of untreated SMA mouse

**Supplementary Movie 2.** General behavior of HITI-treated SMA mouse

**Supplementary Movie 3.** General behavior of cDNA-treated SMA mouse

**Supplementary Movie 4.** General behavior of DUET-treated SMA mouse
